# Supplementary material for: A novel berberine-based colorimetric and fluorimetric probe for hydrazine detection
Source: Royal Society of Chemistry journal article supplement (doi:10.1039/d0nj03599h), 2020-01-01

## Supplementary information

### **A novel berberine-based colorimetric and fluorimetric probe for hydrazine detection**

Shutang, Ruan <sup>a</sup>, Yu Gao <sup>a</sup>, Yunyun Wang <sup>a</sup>, Mingxin Li <sup>a</sup>, Haiyan Yang <sup>a</sup>, Jie Song <sup>b</sup>, Zhonglong Wang <sup>a\*</sup>, Shifa Wang <sup>a\*</sup>

*a. Co-Innovation Center of Efficient Processing and Utilization of Forest Resources, College of Chemical Engineering, College of Light Industry and Food, Nanjing Forestry University, Nanjing, 210037, China*

*b. Department of Chemistry and Biochemistry, University of Michigan-Flint, Flint, MI 48502, USA*

*\* Corresponding author: Dr. and Prof. Shifa Wang*

*Phone: +86-25-85428369. Fax: +86-25-8548369. Email: wangshifa65@163.com*

*\* Corresponding author: Dr. Zhonglong Wang. Email: wang\_zhonglong@njfu.edu.cn.*

# $^1\text{H}$ NMR spectra and $^{13}\text{C}$ NMR spectra for compounds.

## $^1\text{H}$ NMR spectra of compound 2:

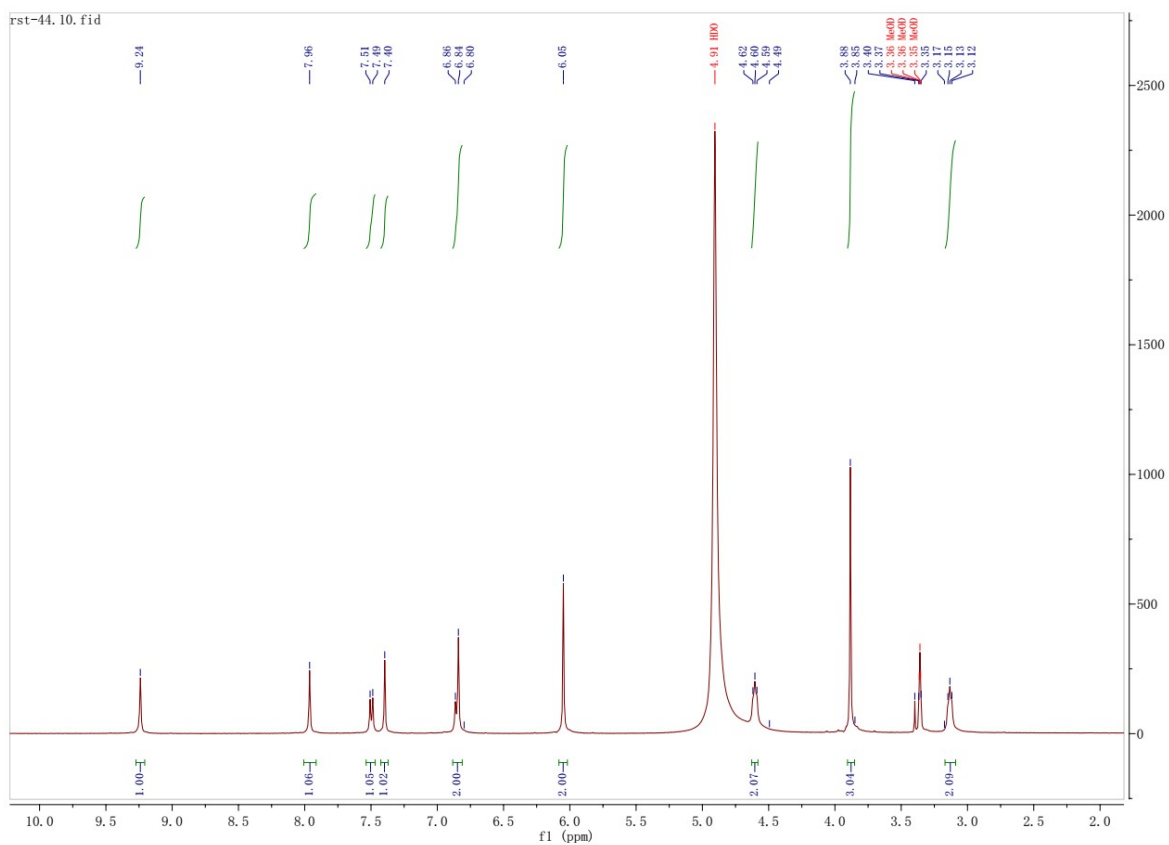

# <sup>13</sup>C NMR spectra of compound 2:

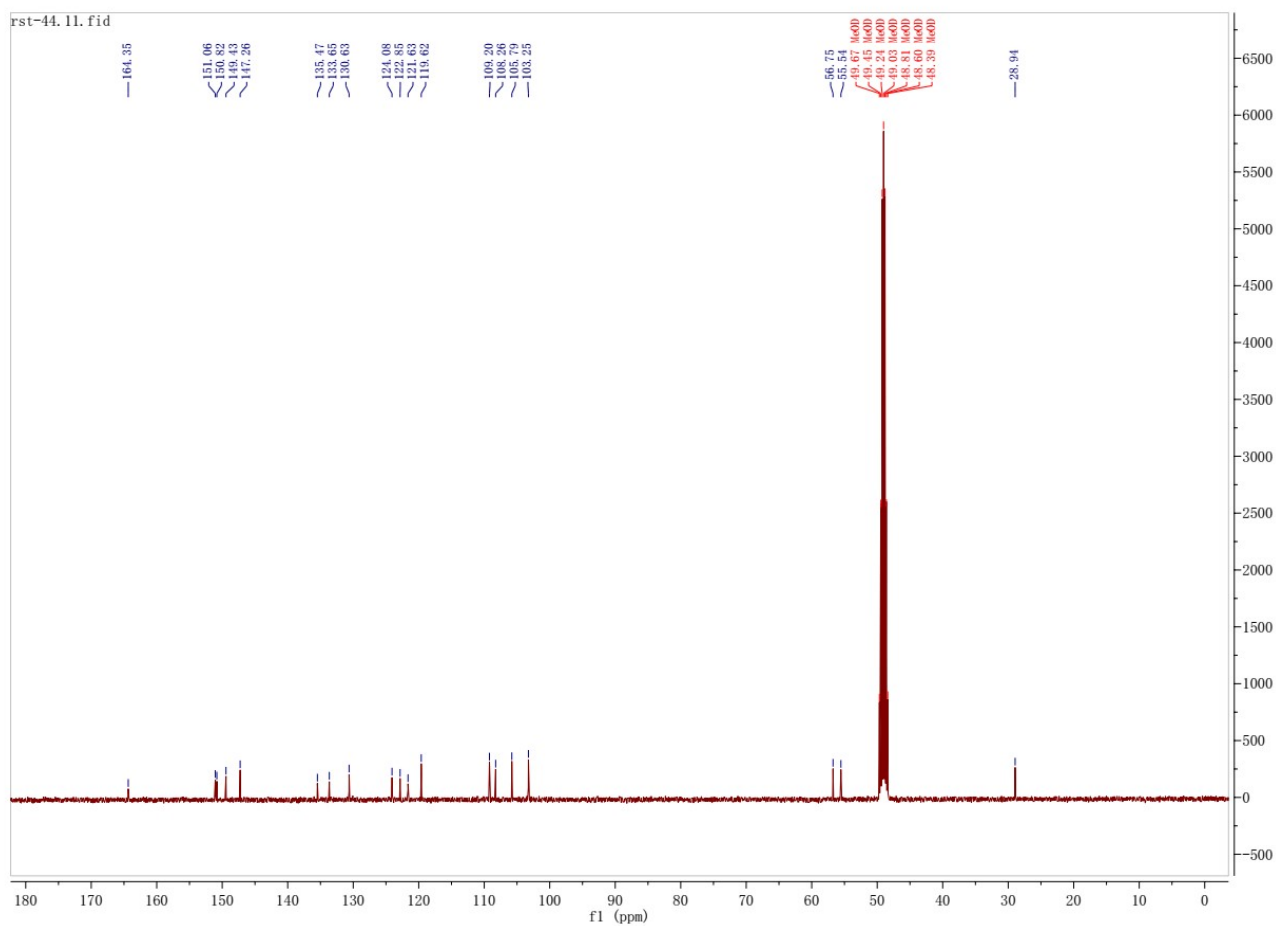

# <sup>1</sup>H NMR spectra of BP:

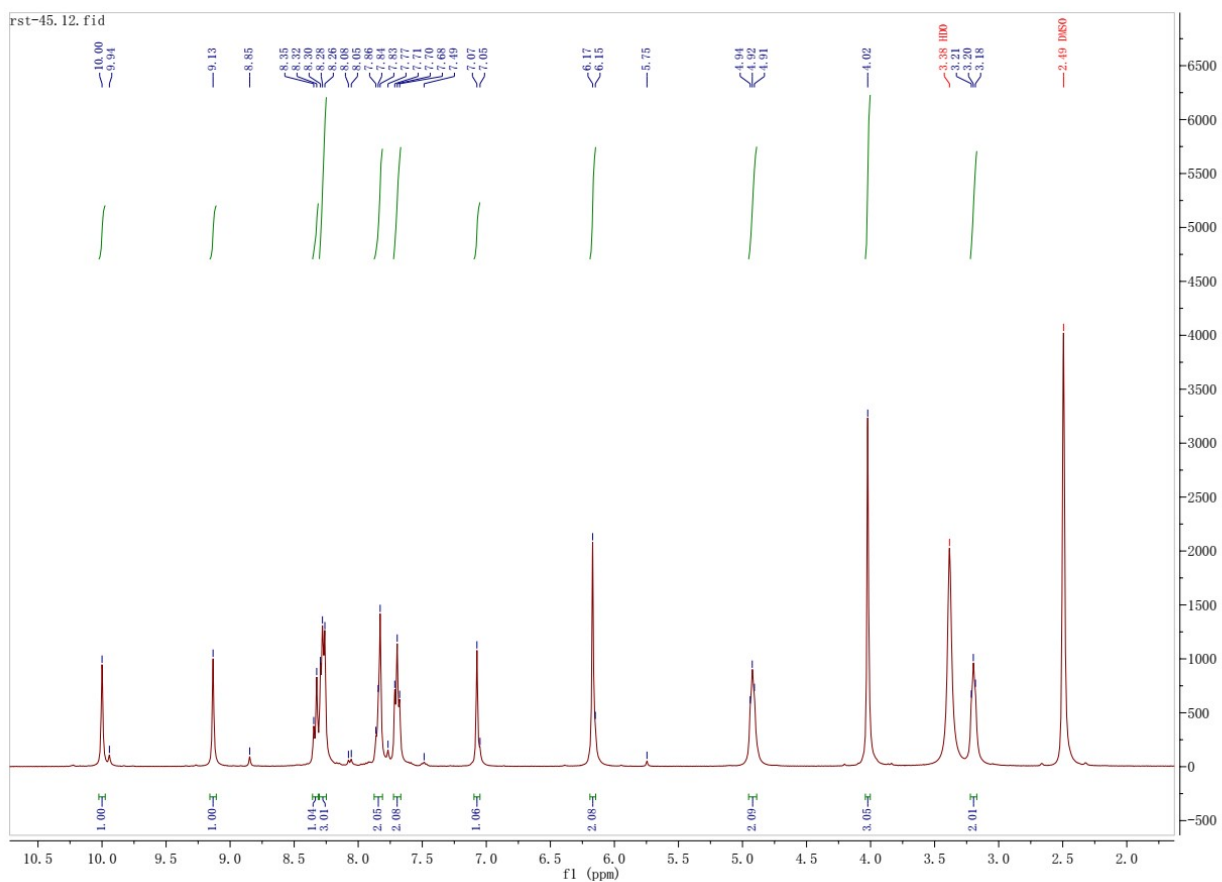

# <sup>13</sup>C NMR spectra of BP:

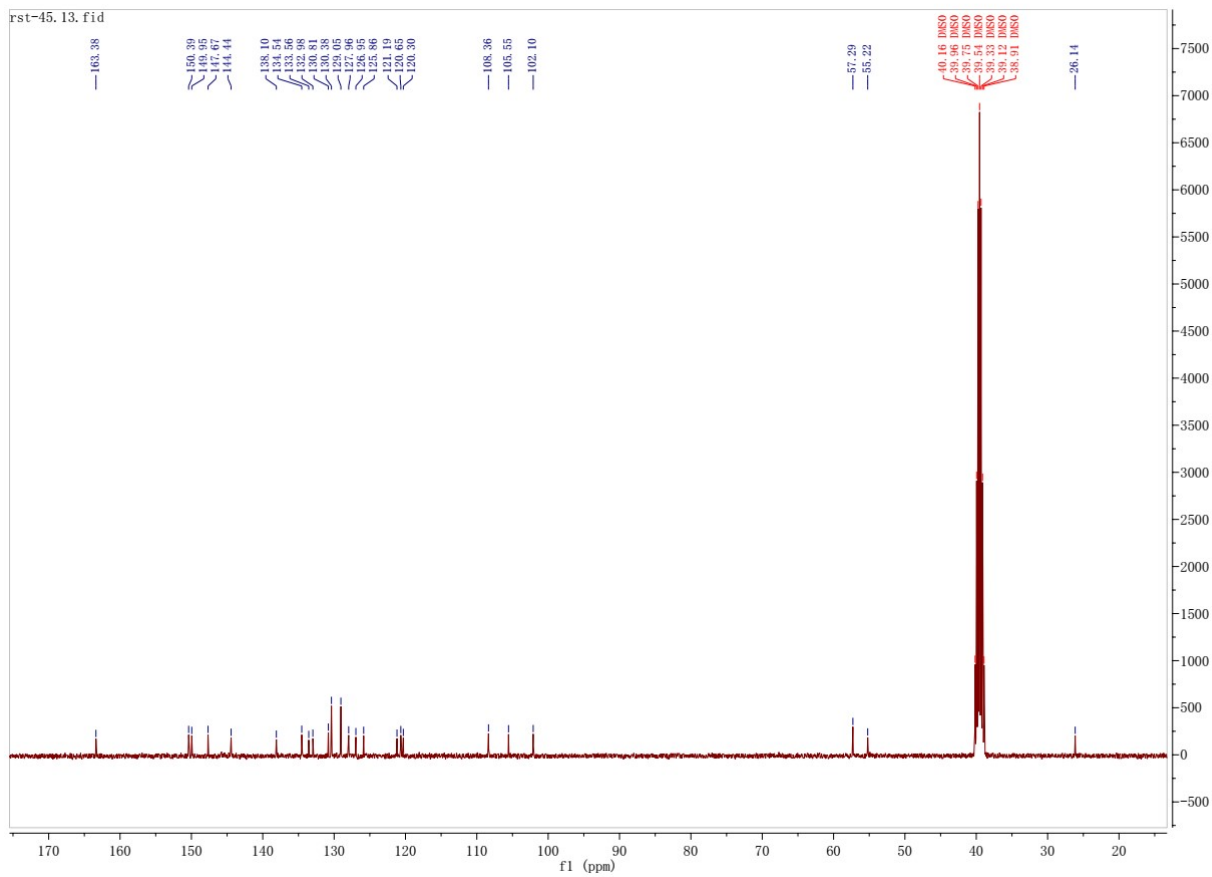

# HR-MS of Compound 2:

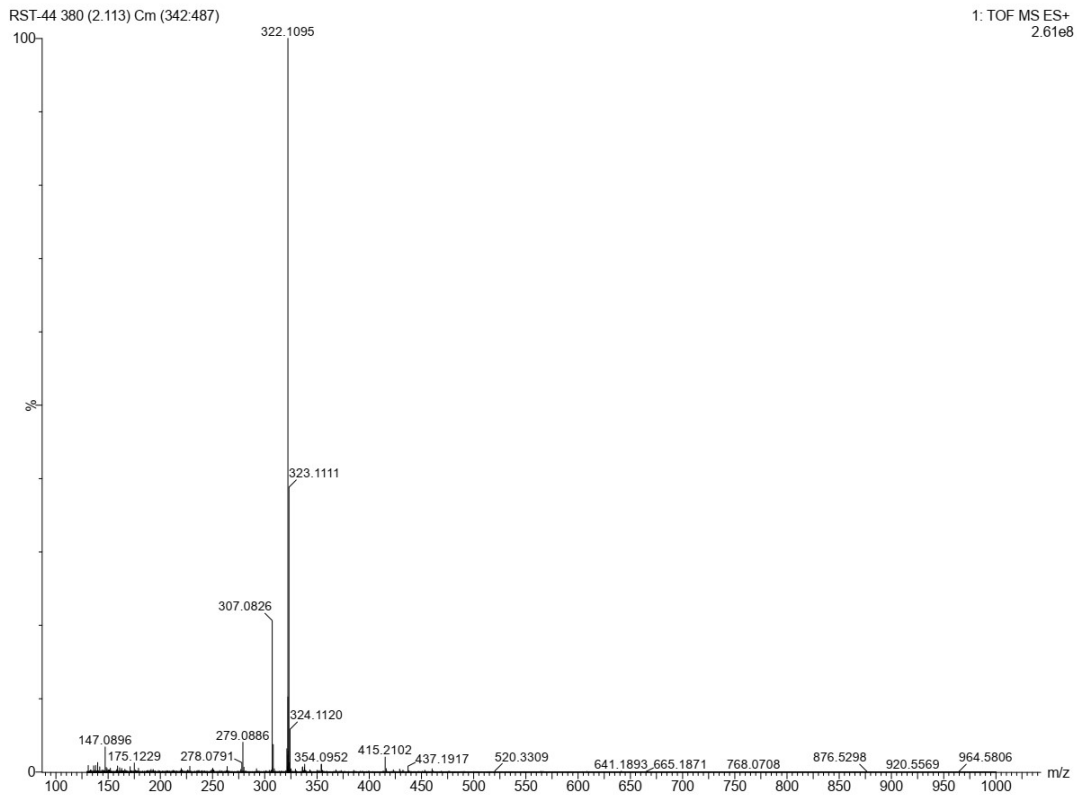

# HR-MS of BP:

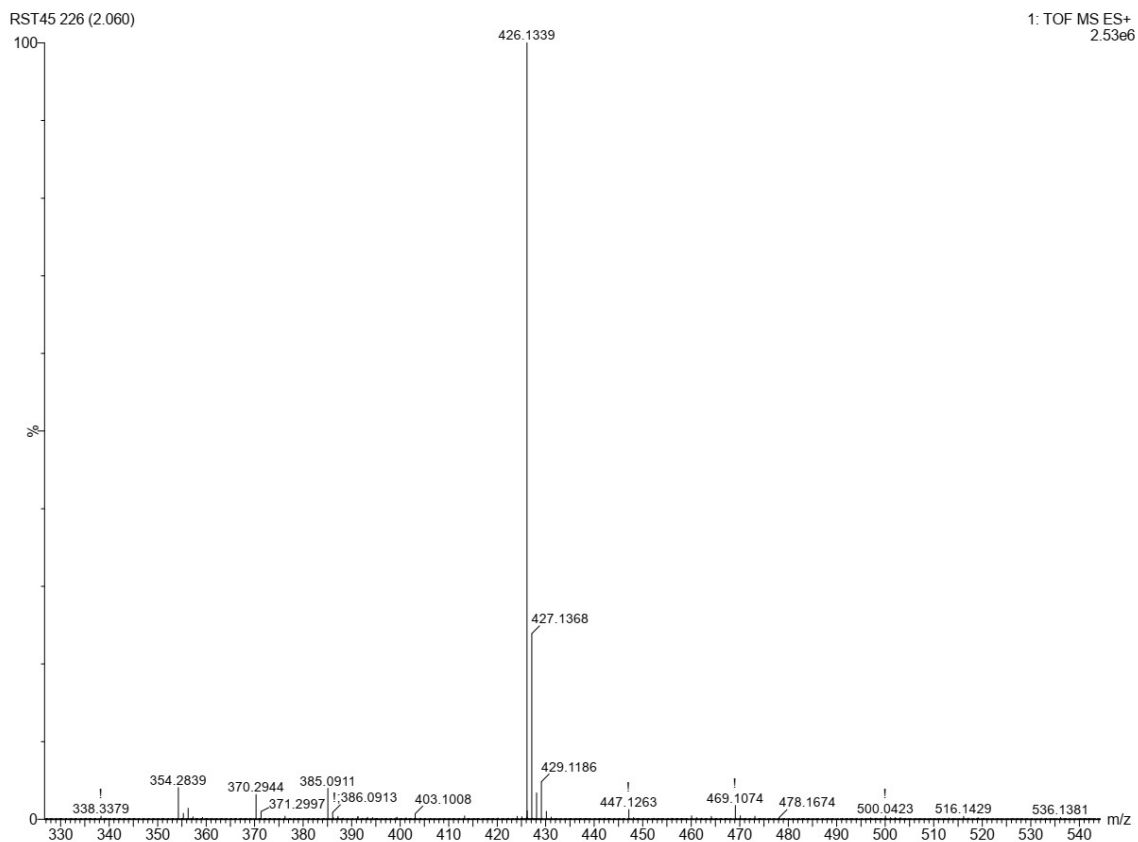

# HR-MS of BP+N<sub>2</sub>H<sub>4</sub>

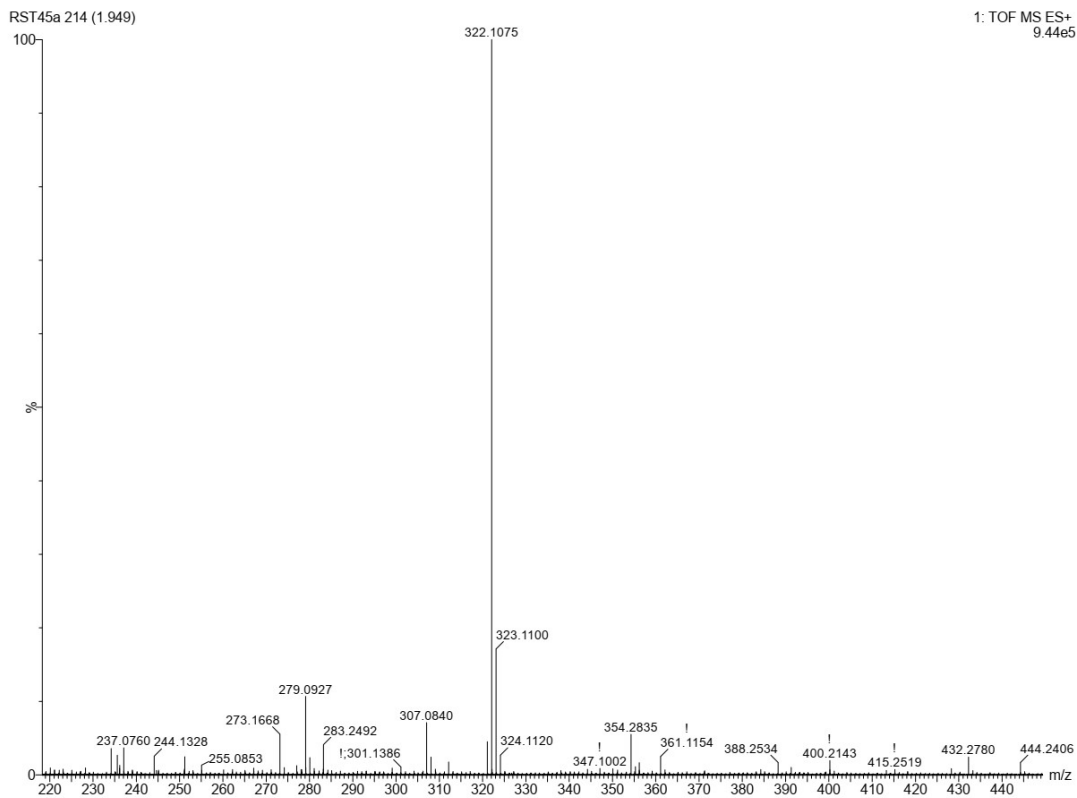

Supplement: d0nj03599h1.pdf [file d0nj03599h1.pdf]
